# Supplementary material for: Local‐Area Walkability and Socioeconomic Disparities of Cardiovascular Disease Mortality in Japan
Source: PubMed Central journal article supplement — J Am Heart Assoc. 2020 Jun 9;9(12):e016152. doi: 10.1161/JAHA.119.016152 (PMC7429057; doi:10.1161/jaha.119.016152), 2020-06-09
Supplement: JAH3-9-e016152-s001.pdf [file JAH3-9-e016152-s001.pdf]

# **SUPPLEMENTAL MATERIAL**

**Table S1. Relative rates of CVD mortality for the walkability attributes stratified by SES.**

| Environmental attributes  | Relative rate<br>(95% CI) |                    |                   |
|---------------------------|---------------------------|--------------------|-------------------|
|                           | Higher SES                | Medium SES         | Lower SES         |
| Population density        |                           |                    |                   |
| Higher                    | 1                         | 1                  | 1                 |
| Medium                    | 1.01 (0.98, 1.05)         | 1.03 (0.99, 1.06)  | 0.99 (0.94, 1.04) |
| Lower                     | 1.11 (1.06, 1.16)*        | 1.05 (1.01, 1.08)* | 0.99 (0.95, 1.04) |
| Road density              |                           |                    |                   |
| Higher                    | 1                         | 1                  | 1                 |
| Medium                    | 1.04 (1.00, 1.07)*        | 1.03 (0.99, 1.07)  | 0.97 (0.92, 1.02) |
| Lower                     | 1.08 (1.03, 1.13)*        | 1.02 (0.99, 1.06)  | 0.99 (0.95, 1.04) |
| Access to commercial area |                           |                    |                   |
| Closer                    | 1                         | 1                  | 1                 |
| Medium                    | 1.01 (0.98, 1.04)         | 1.04 (1.00, 1.08)* | 0.99 (0.94, 1.04) |
| Farther                   | 1.09 (1.04, 1.14)*        | 1.03 (0.99, 1.07)  | 0.98 (0.93, 1.02) |
| Neighborhood walkability  |                           |                    |                   |
| Higher                    | 1                         | 1                  | 1                 |
| Medium                    | 1.02 (0.99, 1.06)         | 1.03 (1.00, 1.07)  | 0.98 (0.93, 1.03) |
| Lower                     | 1.08 (1.03, 1.13)*        | 1.04 (1.00, 1.08)* | 0.98 (0.94, 1.03) |

CVD= cardiovascular disease; SES= socioeconomic status; CI= confidence interval; \* p < 0.05

**Figure S1. Distribution of the environmental attributes across Japan.**

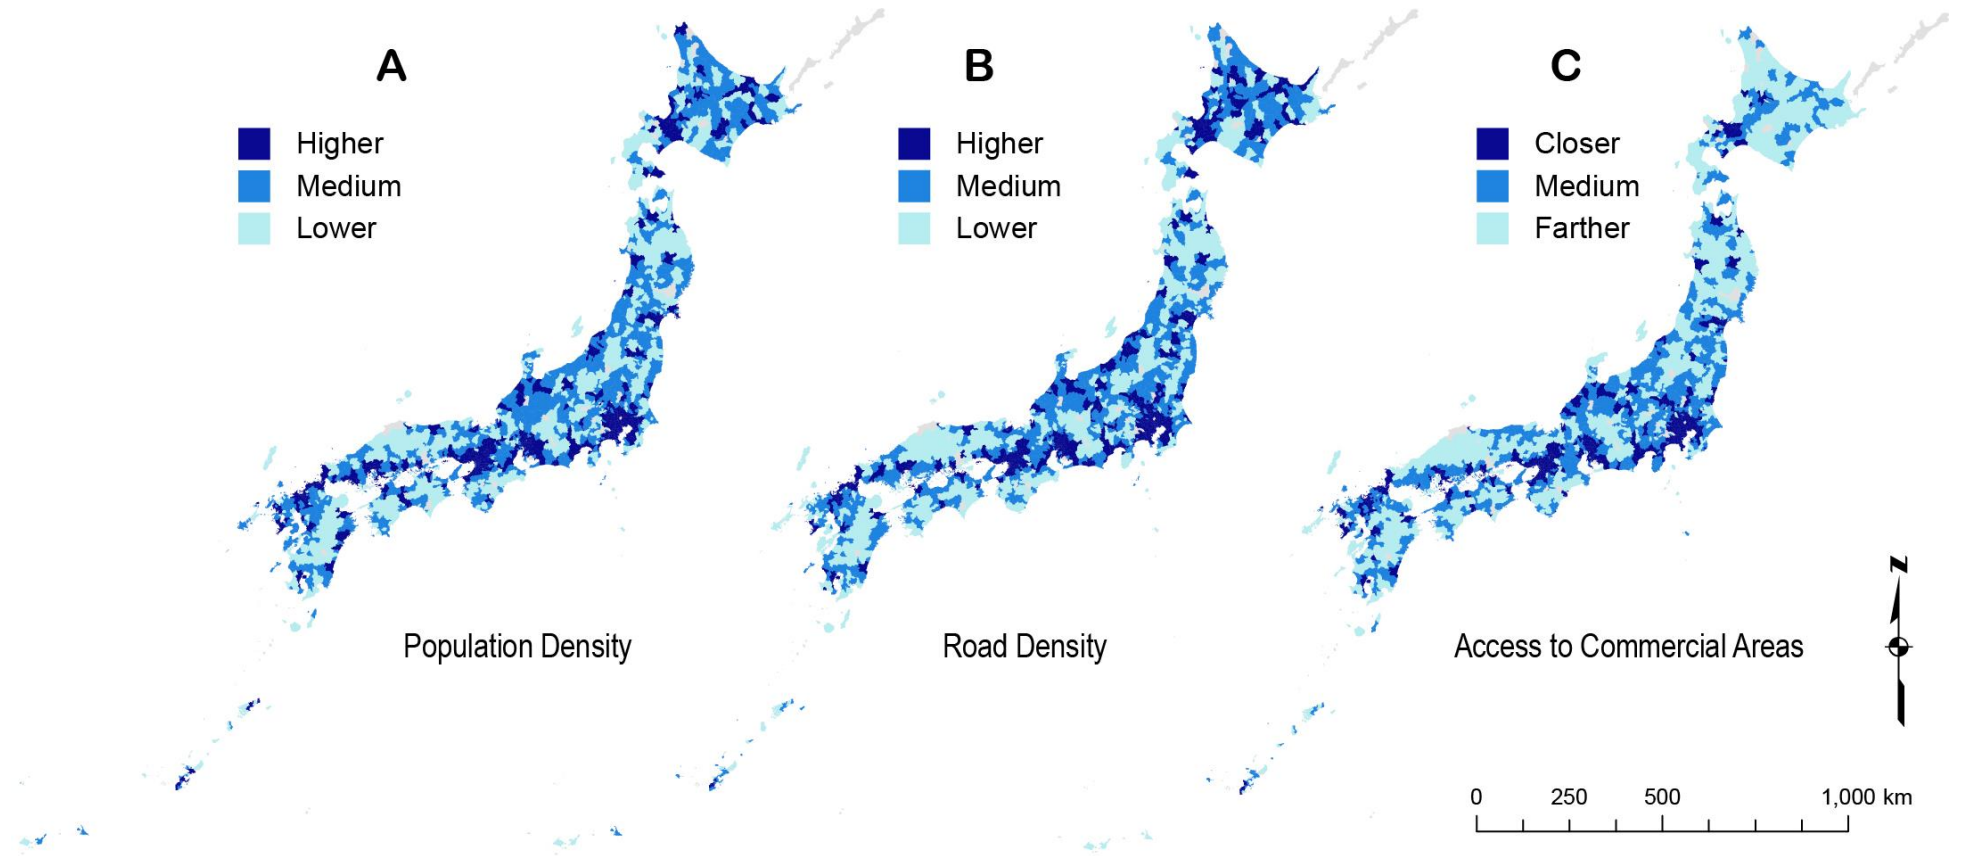

Note. Ogasawara islands were excluded areas and omitted due to the space limit.
